# Supplementary material
Source: Springer Nature journal article supplement (https://www.springermedizin.de/resource/supplementary/12984_2011_378_MOESM3_ESM.pdf/9605890)

**A ( $F=0$ )**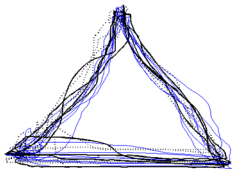**B ( $F=1.3 N$ )**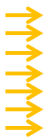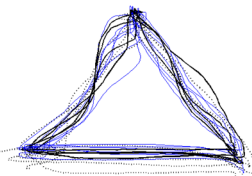**C ( $F=0$ )**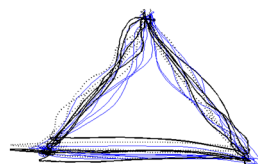**Healthy**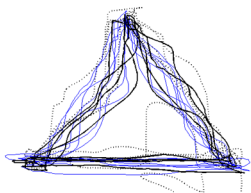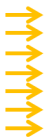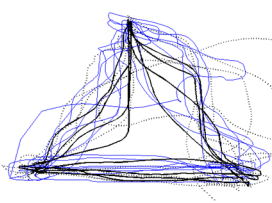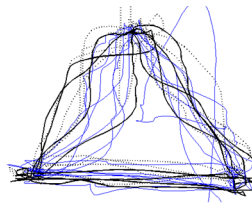

..... First 4 trials

— Last 4 trials

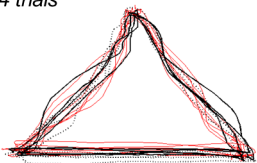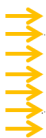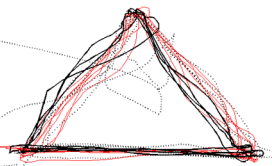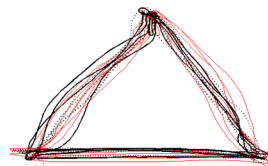**Dystonic**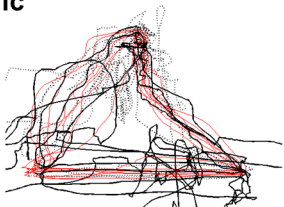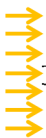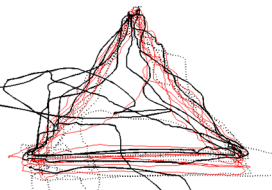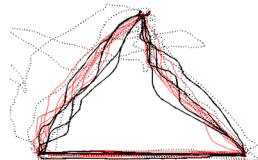

Supplement: MOESM3 [file 9605890]
